# Supplementary material
Source: Springer Nature journal article supplement (https://www.springermedizin.de/resource/supplementary/12882_2012_275_MOESM4_ESM.pdf/9453418)

**A**

QPure

T

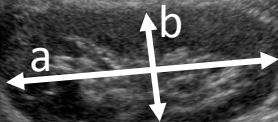

2

4

6

8

6C1  
diffT5.0

22 fps

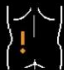**B**

QPure

T

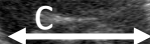

2

4

6

8

6C1  
diffT5.0

22 fps

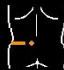

Supplement: MOESM4 [file 9453418]
